# Supplementary material for: Strengths and weaknesses of hospital standardised mortality ratios
Source: HighWire-hosted journal article supplement (doi:10.1136/bmj.c7116), 2010-01-21
Supplement: bota77326.ww1_default.pdf [file bota77326.ww1_default.pdf]

## ***Appendix: construction of the HSMR in England***

### **Cleaning and processing**

We apply Hospital Episode Statistics (HES) data cleaning rules to the Secondary Uses Service (SUS) records. Only ages within the ranges 1-120 and 7001-7007 (special values to indicate age in months for children under 1 year) are considered valid. Duplicate records (those with the same combination of provider, date of birth, sex, postcode, date of admission and episode number (PROCEDURE, DOB, SEX, HOMEADDRESS, EPISODESTART, EPISODEEND, EPISODEORDER), unfinished episodes, those with missing/invalid ADMITDATE and regular attenders (CLASSPAT=3,4) are excluded. Some spells have the same date of admission (ADMITDATE) but different dates of discharge (DISCHARGE). This is not valid unless the patient was discharged and readmitted on the same day: if not, the spell with the earliest DISCHARGE was arbitrarily taken to be the valid one. Episodes relating to the invalid spell are excluded at this stage.

As hospitals merge and services reorganised, provider codes (PROCEDURE) may change from one year to the next. In order to track hospitals over time, the provider codes need to be unified, i.e. just one code needs to identify each trust throughout. To date, provider codes have been unified as of the trust status at April 2009.

### **Linkage**

The data are in the form of consultant episodes (the continuous period during which the patient is under the care of one consultant), which need to be linked into admissions (or “spells”). Records are assumed to belong to the same person if they match on date of birth, sex and postcode (DOB, SEX, HOMEADDRESS) as the NHS number is either not available or not recorded accurately enough across the whole period for which we have data. For the period from 2000/01 to 2005/06 we have used HESID as a patient identifier (we did not have this for earlier HES years). This links patients together based on either their NHS number (with other fields added) or their local patient identifier (with other fields added). A detailed algorithm on how the HESID was derived by the Department of Health is available on request from the NHS Information Centre.

Spells ending in transfer to another NHS hospital are linked together (“superspell”), allowing for a difference between discharge from the first trust and admission to the next trust of up to two days, using ADMIMETH= 81 or DISDEST/ADMISORC values of 49-53 (which refer to NHS providers). Spells with missing or negative length of stay are excluded from all analyses as for invalid age and sex.

### **Diagnosis derivation**

We use the 56 diagnostic groups which contribute to 80% of in-hospital deaths in England. All 56 groups are listed in Table A1, and further information on the Clinical Classification System (including the ICD codes making up the groups) is available at <http://www.ahrq.gov/data/hcup/icd10usrqd.htm>.

For each spell we assign a diagnosis based on the primary diagnosis in the first episode of care. However, if the primary diagnosis is a vague symptom or sign we look to the subsequent episode (of a multi-episode spell) to derive a diagnosis.

Table A1. List of CCS groups used in English HSMRs together with their ROC c statistic for in-hospital mortality

| CCS group | Description and C statistic for in-hospital mortality                          |       |
|-----------|--------------------------------------------------------------------------------|-------|
| 2         | Septicemia (except in labour)                                                  | 0.774 |
| 12        | Cancer of oesophagus                                                           | 0.813 |
| 13        | Cancer of stomach                                                              | 0.809 |
| 14        | Cancer of colon                                                                | 0.830 |
| 15        | Cancer of rectum and anus                                                      | 0.844 |
| 17        | Cancer of pancreas                                                             | 0.768 |
| 19        | Cancer of bronchus, lung                                                       | 0.779 |
| 24        | Cancer of breast                                                               | 0.935 |
| 27        | Cancer of ovary                                                                | 0.843 |
| 29        | Cancer of prostate                                                             | 0.859 |
| 32        | Cancer of bladder                                                              | 0.917 |
| 38        | Non-Hodgkin's lymphoma                                                         | 0.805 |
| 39        | Leukaemias                                                                     | 0.814 |
| 42        | Secondary malignancies                                                         | 0.796 |
| 43        | Malignant neoplasm without specification of site                               | 0.800 |
| 55        | Fluid and electrolyte disorders                                                | 0.766 |
| 59        | Deficiency and other anaemia                                                   | 0.755 |
| 68        | Senility and organic mental disorders                                          | 0.664 |
| 100       | Acute myocardial infarction                                                    | 0.743 |
| 101       | Coronary atherosclerosis and other heart disease                               | 0.862 |
| 103       | Pulmonary heart disease                                                        | 0.778 |
| 106       | Cardiac dysrhythmias                                                           | 0.834 |
| 107       | Cardiac arrest and ventricular fibrillation                                    | 0.702 |
| 108       | Congestive heart failure, nonhypertensive                                      | 0.647 |
| 109       | Acute cerebrovascular disease                                                  | 0.705 |
| 114       | Peripheral and visceral atherosclerosis                                        | 0.895 |
| 115       | Aortic, peripheral, and visceral artery aneurysms                              | 0.873 |
| 117       | Other circulatory disease                                                      | 0.853 |
| 122       | Pneumonia (except that caused by tuberculosis or sexually transmitted disease) | 0.800 |
| 125       | Acute bronchitis                                                               | 0.826 |
| 127       | Chronic obstructive pulmonary disease and bronchiectasis                       | 0.686 |
| 129       | Aspiration pneumonitis, food/vomitus                                           | 0.716 |
| 130       | Pleurisy, pneumothorax, pulmonary collapse                                     | 0.810 |
| 131       | Respiratory failure, insufficiency, arrest (adult)                             | 0.738 |
| 133       | Other lower respiratory disease                                                | 0.873 |
| 134       | Other upper respiratory disease                                                | 0.926 |
| 145       | Intestinal obstruction without hernia                                          | 0.819 |
| 148       | Peritonitis and intestinal abscess                                             | 0.868 |
| 149       | Biliary tract disease                                                          | 0.912 |
| 150       | Liver disease, alcohol-related                                                 | 0.700 |
| 151       | Other liver diseases                                                           | 0.850 |

|     |                                          |       |
|-----|------------------------------------------|-------|
| 153 | Gastrointestinal haemorrhage             | 0.802 |
| 154 | Noninfectious gastroenteritis            | 0.881 |
| 155 | Other gastrointestinal disorders         | 0.895 |
| 157 | Acute and unspecified renal failure      | 0.741 |
| 158 | Chronic renal failure                    | 0.873 |
| 159 | Urinary tract infections                 | 0.804 |
| 197 | Skin and subcutaneous tissue infections  | 0.904 |
| 199 | Chronic ulcer of skin                    | 0.784 |
| 224 | Other perinatal conditions               | 0.953 |
| 226 | Fracture of neck of femur (hip)          | 0.743 |
| 231 | Other fractures                          | 0.804 |
| 233 | Intracranial injury                      | 0.753 |
| 237 | Complication of device, implant or graft | 0.809 |
| 245 | Syncope                                  | 0.764 |
| 251 | Abdominal pain                           | 0.935 |

### Model fitting

We define our death outcome when the patient dies in hospital at any time during their stay in hospital (superspell). The spell in which death occurs (DISMETH = 4 or 5) may be post-transfer, but deaths are assigned to all the trusts in the superspell. We exclude day cases (spells where CLASSPAT = 2 in first episode) from our risk models and where a trust has more than one spell in a superspell, we include only the first spell.

For each diagnosis group (CCS) we derive predicted probabilities for inpatient in-hospital mortality by fitting logistic regression models using SAS V9.1. We apply SAS's inbuilt backwards elimination procedure for variable selection, which starts with a model including all the selected explanatory variables and then automatically removes the variable with smallest F-statistic at each step until all the non-significant variables (using a cut-off of  $P > 0.1$ ) have been excluded.

We use the variables defined in Table A2 as our predictors. We recategorise four variables – age group, deprivation, comorbidity and number of previous admissions – depending on the absolute number of events, so that each category contains at least 20 events. Starting from the first (lowest) category, we combine it with the next lowest category if it contains fewer than 20 events and continue combining until that total has been reached. We then inspect the next highest category and repeat the process as necessary. If the last category is left with fewer than 20 events then it is combined with the second last category as one group. This is to assist with model convergence. We have also tried using 10 as a minimum rather than 20 and the coefficients rarely differed.

Day cases are given a predicted risk of zero, but any deaths occurring in day cases are included in the HSMR. Risk estimates for data in years after the last year included in the risk model (currently 2008/09) are calculated using the log odds value for the last year in the model.

The success of case-mix adjustment for accurately predicting the outcome (discrimination) was evaluated using the area under the receiver operating characteristic curve (c statistic) given in Table 3. The c statistic is the probability of assigning a greater risk of death to a randomly selected patient who died compared with a randomly selected patient who survived. A value of 0.5 suggests that the model is no better than random chance in predicting death. A value of 1.0 suggests perfect discrimination, though for some models the theoretical maximum may be less than this. In general, values less than 0.7 are considered to show poor discrimination, values of 0.7-0.8 can be described as reasonable and values above 0.8 suggest good discrimination. Models were also assessed by calibration plots and other measures such as McFadden's R-squared.

Table A2. Covariates used in risk-adjustment models used in each individual Clinical Classification System diagnosis group underlying the English HSMR in general order of importance.

| Variable                                        | Description                                                                                | Details and issues                                                                |
|-------------------------------------------------|--------------------------------------------------------------------------------------------|-----------------------------------------------------------------------------------|
| Age                                             | Categorical: <1, 1-4, 5-9 then five-year bands up to 90+                                   | Record excluded if invalid                                                        |
| Sex                                             |                                                                                            | Record excluded if invalid                                                        |
| CCS diagnosis subgroup                          | As for diagnosis group                                                                     |                                                                                   |
| Year                                            | Financial year                                                                             |                                                                                   |
| Month of admission                              |                                                                                            | To adjust for seasonal variations                                                 |
| Method of admission                             |                                                                                            | Unplanned v other                                                                 |
| Charlson index of comorbidity                   | Covers chronic conditions such as diabetes and dementia                                    | Based on Australian ICD10 version. We have recently recalibrated for English data |
| Palliative care                                 | 0/1 flag                                                                                   | Based on ICD10 code Z515 or specialty of any episode in the admission             |
| Number of unplanned admissions in previous year | 0, 1, 2, 3+                                                                                | Attempts to adjust for disease severity and differing admission thresholds        |
| Source of admission                             | Where patient is admitted from, e.g. their own home, another hospital                      | Not always well coded                                                             |
| Ethnic group                                    | Six groups                                                                                 | Around 15% missing in recent data (30% in earlier years)                          |
| Deprivation                                     | Population-weighted quintiles of the Carstairs index at the small area level (output area) | Includes a sixth quintile for postcodes not matching to an output area            |

NB Only factors which are statistically significant ( $p < 0.1$ ) are included in models for each CCS diagnosis group
